# Supplementary material for: Peyer’s Patches and Mesenteric Lymph Nodes Cooperatively Promote Enteropathy in a Mouse Model of Food Allergy
Source: PubMed Central journal article supplement (PMC4188560; doi:10.1371/journal.pone.0107492), 2014-10-07
Supplement: pone.0107492.s008.pdf [file pone.0107492.s008.pdf]

## 1 **Materials and Methods**

2

### 3 **Measurement of OVA uptake**

4           To analyze OVA uptake on day 3 of feeding the respective diets, EW-fed and  
5 CN-fed normal or PP<sup>-</sup> OVA23-3 mice were food-fasted for at least 3 h before  
6 administration of 10 mg OVA (Grade V, Seikagaku Corporation, Tokyo, Japan) diluted  
7 in 200 microliter of PBS by orogastric gavage. Blood was collected from their  
8 retroorbital plexus at 0, 15, 30, 60 and 120 min after OVA administration; sera were  
9 obtained after centrifugation (4°C, 8000 rpm).

10           Serum concentrations of OVA were determined by ELISA. The wells of  
11 96-well microplates (Maxi Sorp; Nunc, Roskilde, Denmark) were coated at 4°C  
12 overnight with 1 mg/ml of rabbit anti-chicken OVA Ab (Bethyl, Montgomery, TX,  
13 USA) diluted in PBS. After wells were blocked with 1% rabbit serum in PBS  
14 containing 0.05% Tween-20 (PBS-T), each sample and the OVA standard were diluted  
15 appropriately with PBS-T containing 1% bovine serum albumin and added to the wells.  
16 OVA was detected by using horseradish peroxidase-labeled rabbit anti-chicken OVA  
17 Ab. Conjugation of horseradish peroxidase (Roche Diagnostics Japan, Tokyo, Japan)  
18 with rabbit anti-chicken OVA Ab (Bethyl, Montgomery, TX, USA) was done by using  
19 LC-SMCC (Pierce, Rockford, IL, USA); 3,3',5,5'-Tetramethyl benzidine (Pierce,  
20 Rockford, IL, USA) was served as a substrate, and the reaction was stopped with 2N  
21 H<sub>2</sub>SO<sub>4</sub>. The absorbance was measured at 450 nm. Positive reactions were determined by  
22 comparison with the concentration of OVA in sera collected before administration.

23

#### 24 **Preparation and culture of CD4<sup>+</sup> T-cells**

25           MLN, PP and splenic CD4<sup>+</sup> T-cells were purified from OVA23-3 mice  
26 lymphocytes by using a MACS cell-separation system with CD4 beads (Miltenyi Biotec,  
27 Bergish Gladbach, Germany). The number and ratio of CD4<sup>+</sup> T-cells, which exceeded  
28 95% in each analysis, infiltrating each tissue was determined by staining with an  
29 allophycocyanin-conjugated anti-mouse CD4 Ab (GK1.5, Bio legend, San Diego, CA,  
30 USA) followed by analysis on an LSR or a FACSCalibur (BD Bioscience, San Jose, CA,  
31 USA) flow cytometer. CD4<sup>+</sup> T-cells ( $1 \times 10^5$  cells/well) were cultured in the presence or  
32 absence of OVA (1 mg/mL) with mitomycin-C treated splenocytes from BALB/cA  
33 mice as antigen-presenting cells ( $4 \times 10^5$  cells/well) in complete RPMI1640. After  
34 incubation for 48 h, the supernatant was collected from each well to determine cytokine  
35 concentration by ELISA, as described previously [12]. To measure T-cell proliferation,  
36 [<sup>3</sup>H]-thymidine (1 microCi; Moravek Biochemicals, Brea, CA, USA) was pulsed into  
37 the wells. After incubation for an additional 18 h, [<sup>3</sup>H]-thymidine incorporation was  
38 assayed by liquid scintillation. Proliferation was expressed as the mean number of  
39 counts per minute (cpm) of triplicate cultures [12].

40

#### 41 **Preparation of lamina propria lymphocytes and staining of CD4<sup>+</sup> T cells**

42           To examine the infiltration of CD4<sup>+</sup> T cells into lamina propria of the small  
43 intestine, lamina propria lymphocytes were isolated from CN-fed or EW-fed OVA23-3  
44 mice in accordance with a protocol previously reported [25]. Briefly, after removal of

45 PPs, the intestine was cut to 2-cm pieces and stirred in RPMI 1640 containing 0.5 mM  
46 EDTA and 2% FCS. The tissues then were stirred in 0.5 mg/mL collagenase S1 (Nitta  
47 Gelatin, Osaka, Japan) in RPMI 1640 containing 2% FCS. Lymphocytes were isolated  
48 at the interface between the 40% and 75% layers of a discontinuous Percoll gradient  
49 (GE Healthcare Life Science, Tokyo, Japan), and the total cell number was obtained by  
50 staining cells with toluidine blue. Isolated cells were stained with  
51 phycoerythrin-conjugated anti-CD4 mAbs (BD Biosciences) and analyzed by using  
52 flow cytometry (FACS Calibur, BD Biosciences).
