# Supplementary material for: Peyer’s Patches and Mesenteric Lymph Nodes Cooperatively Promote Enteropathy in a Mouse Model of Food Allergy
Source: PubMed Central journal article supplement (PMC4188560; doi:10.1371/journal.pone.0107492), 2014-10-07
Supplement: pone.0107492.s010.pdf [file pone.0107492.s010.pdf]

**Result of Figure S2; Serum concentrations of OVA-specific IgE Abs of EW-fed normal OVA23-3 mice.**

Serum OVA-specific IgE responses were increased ( $P < 0.01$ ) on day 21 compared with the level before receiving EW diet. On day 28, the IgE responses were significantly ( $P < 0.05$ ) decreased compared with the level on day 21, but still elevated higher ( $P < 0.05$ ) than the level before receiving EW diet (Figure S2).
